# Supplementary material for: Supporting Return-to-Work and Care Continuity After Stroke: Evaluation of the SLS CHARTER Coordinated Care Model
Source: Research Square preprint supplement (doi:10.21203/rs.3.rs-6697630/v1), 2025-07-04
Supplement: Supplementary file 1 [file af4ef37b1c4689298d15aefc.docx]

**Supplementary**

**Figure 1**: Comparison of the traditional stroke care model and the Stroke Life Support Central Health Alliance, Registry & Technology Enabled caRe (SLS CHARTER) model

**
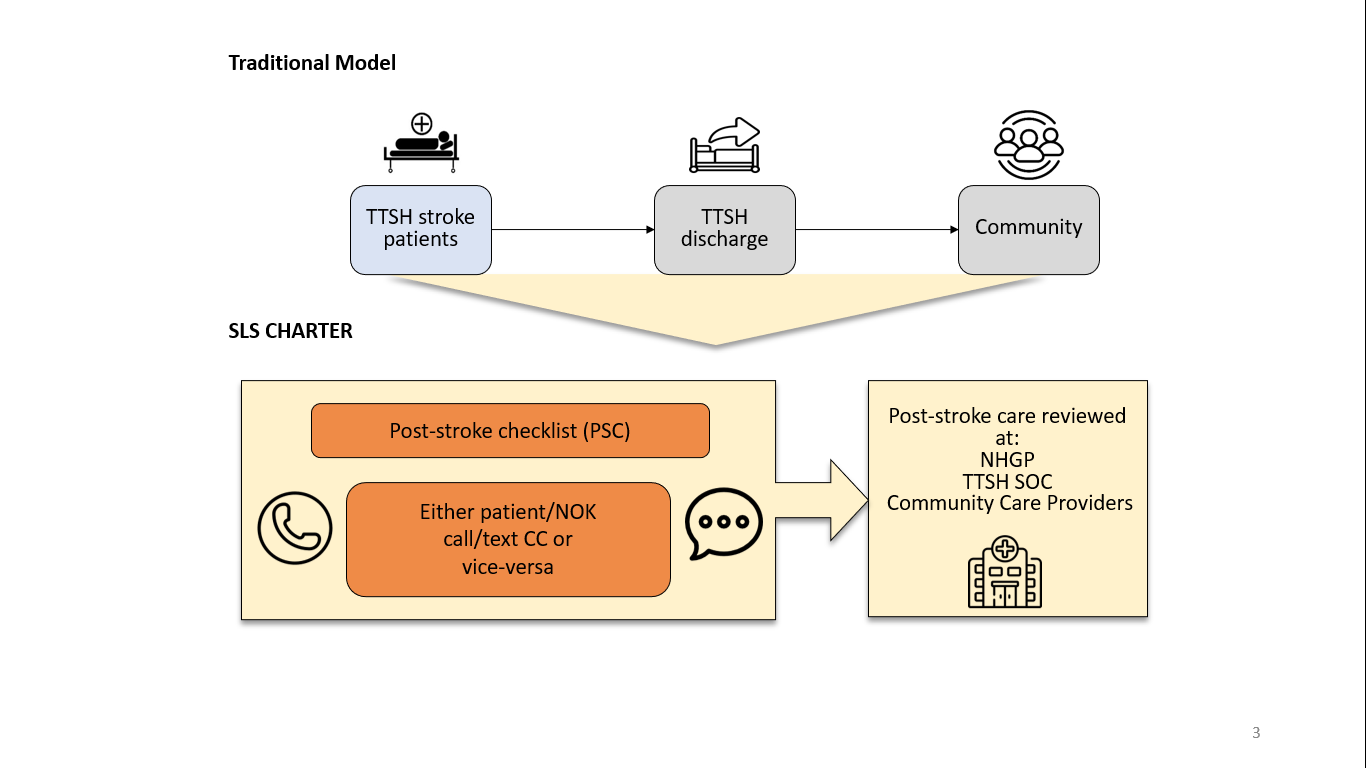
**

**Table 1.** Sub-acute rehabilitation institutions examined in the study.

| **List of sub-acute rehabilitation institutions** | **Description** |
| --- | --- |
| Tan Tock Seng Hospital (TTSH) Rehabilitation | Enables TTSH patients to achieve a maximum level of independence and facilitate community reintegration |
| Ang Mo Kio Community Hospital | Has a close partnership with TTSH; Care is primarily focused on providing rehabilitative and sub-acute care for elderly patients at an affordable price |
| Ren Ci Community Hospital | Connected to and collaborates strongly with neighbouring TTSH; Provides patients with a smooth transition from medical dependence to functional independence |
| Integrated Care Hub Rehabilitation | Launched by TTSH; Provides inpatient rehabilitation services with upgraded facilities and technology, that will enable closer coordination of care and patient transfers, ultimately allowing for a faster transition back to the community |

**Table 2.** Specialist Outpatient Centres examined in the study.

| **List of Tan Tock Seng Hospital (TTSH) Specialist Outpatient Centres** |
| --- |
| TTSH Physiotherapy (PT) |
| TTSH Occupational Therapy (OT) |
| TTSH Speech Therapy (ST) |
| TTSH Home-based PT |
| TTSH Home-based OT |
| TTSH Home-based ST |
| TTSH Home-based Psychology |
| TTSH Home-based Nursing |
| TTSH Home-based Medical Social Worker (MSW) |
| TTSH Home-based Case Management |
| TTSH Neurology (NL) |
| TTSH NL Radiology |
| TTSH Neurosurgery (NS) |
| TTSH Rehab |
| TTSH Psychiatry |
| TTSH Consultation-Liaison Interventions for the Mind and Brain (CLIMB) |

**Table 3**. Day care centre providers examined in the study.

| **List of community service providers** |
| --- |
| Ang Mo Kio Thye Hua Kwan Hospital Day Rehabilitation Centre Physiotherapy/Occupational Therapy |
| Handicaps Welfare Association Physiotherapy/Occupational Therapy |
| Kwong Wai Shiu Hospital Physiotherapy/Occupational Therapy |
| National Trade Union Congress Health Physiotherapy/Occupational Therapy |
| Ren Ci Day Rehabilitation Centre Physiotherapy/Occupational Therapy |
| St Luke’s ElderCare Physiotherapy/Occupational Therapy |
| Society for the Physically Disabled Physiotherapy/Occupational Therapy |
| Sunlove Physiotherapy/Occupational Therapy |
| Abilities Beyond Limitations and Expectations Physiotherapy/Occupational Therapy |
| Asian Women’s Welfare Association Physiotherapy/Occupational Therapy |
| St Hilda’s Physiotherapy/Occupational Therapy |

**Table 4**. Baseline characteristics of SLS patients who used and did not use Post Stroke Checklist (PSC).

| Characteristics | Did not use PSC  (n=13) | Used PSC  (n=193) | | p-value |
| --- | --- | --- | --- | --- |
| **Age – Mean (SD)** | 71.9 (11.0) | 62.4 (11.7) | | 0.0048 |
| **Gender – n (%)** |  |  | | 0.636 |
| Female | 4 (30.8) | 72 (37.3) | |  |
| Male | 9 (69.2) | 121 (62.7) | |  |
| **Marital status – n (%)** |  |  | | 0.031 |
| Single | 0 (0.0) | 27 (14.1) | |  |
| Married | 8 (61.5) | 135 (70.3) | |  |
| Divorced | 1 (7.7) | 15 (7.8) | |  |
| Widowed | 4 (30.8) | 15 (7.8) | |  |
| **Living arrangement – n (%)** |  |  | 0.001 | |
| Alone | 0 (0.0) | 19 (9.8) | |  |
| Spouse | 5 (38.5) | 36 (18.7) | |  |
| Spouse and/or children | 7 (53.9) | 104 (53.9) | |  |
| Other family members | 0 (0.0) | 24 (12.4) | |  |
| Unrelated caregiver | 1 (7.7) | 0 (0.0) | |  |
| Others | 0 (0.0) | 10 (5.2) | |  |
| **Premorbid (MRS) – n (%)** |  |  | | 0.170 |
| No symptoms | 11 (84.6) | 185 (95.9) | |  |
| No significant disability | 2 (15.4) | 8 (3.9) | |  |
| Slight disability | 0 (0.0) | 1 (0.5) | |  |
| Moderate disability | 0 (0.0) | 1 (0.5) | |  |
| Moderate to severe disability | 0 (0.0) | 0 (0.0) | |  |
| Severe disability | 0 (0.0) | 0 (0.0) | |  |
| **Highest education level – n (%)** |  |  | | 0.211 |
| No formal education | 4 (30.8) | 23 (11.9) | |  |
| Primary | 3 (23.1) | 55 (28.5) | |  |
| Secondary | 3 (23.1) | 62 (32.1) | |  |
| Diploma/Degree | 1 (7.7) | 43 (22.3) | |  |
| Postgraduate | 1 (7.7) | 5 (2.6) | |  |
| Pre-University/NITEC | 1 (7.7) | 5 (2.6) | |  |
| **Premorbid caregiver status – n (%)** |  |  | | 0.001 |
| Independent | 11 (84.6) | 191 (99.0) | |  |
| Family (informal) caregiver | 1 (7.7) | 1 (0.5) | |  |
| Formal caregiver | 1 (7.7) | 1 (0.5) | |  |
